# Supplementary material for: Erythropoietin Levels Increase during Cerebral Malaria and Correlate with Heme, Interleukin-10 and Tumor Necrosis Factor-Alpha in India
Source: PubMed Central journal article supplement (PMC4956275; doi:10.1371/journal.pone.0158420), 2016-07-21
Supplement: pone.0158420.s001.pdf [file pone.0158420.s001.pdf]

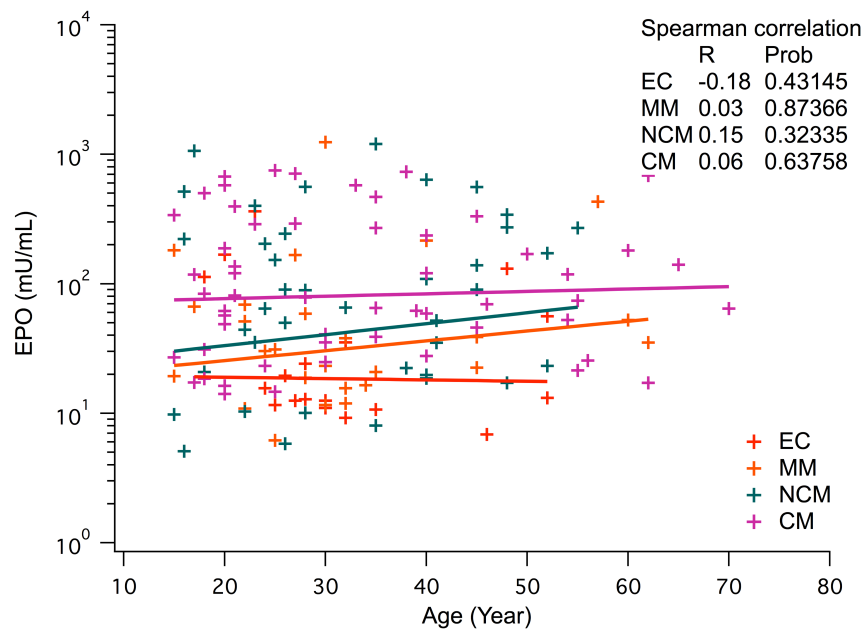

**S1 Figure. Spearman rank's correlation analyzes of plasma EPO levels with age in different clinical groups of malaria-infected patients.**
